# Supplementary material
Source: publisher site journal article supplement (https://www.dovepress.com/article/319890)
Supplement: Supplementary file 1 [file get_supplementary_file.php]

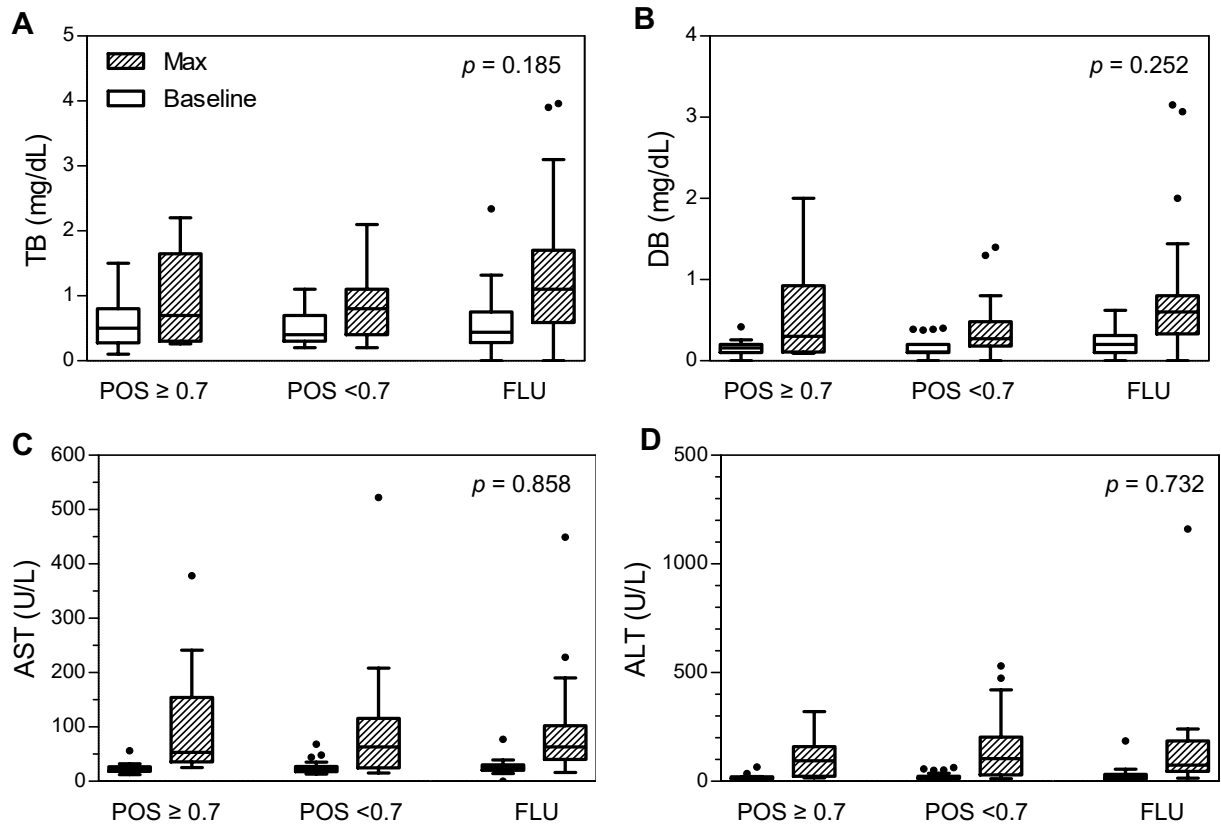

**Supplementary Figure S1** Changes in liver function test values during exposure to azole antifungal drugs

- A. Total bilirubin (TB)
- B. Direct bilirubin (DB)
- C. Aspartate aminotransferase (AST)
- D. Alanine aminotransferase (ALT)
